# Supplementary material for: Narrow-band red-emitting KZnF3:Mn4+fluoroperovskites: insights into electronic/vibronic transition and thermal quenching behavior
Source: Royal Society of Chemistry journal article supplement (doi:10.1039/c8tc04398a), 2018-01-01
Supplement: c8tc04398a1.pdf [file c8tc04398a1.pdf]

## Supporting information

### **Narrow-band red-emitting $\text{KZnF}_3: \text{Mn}^{4+}$ fluoroperovskite: insights into electronic/vibronic transition and thermal quenching behavior**

Tao Hu,<sup>a</sup> Hang Lin,<sup>a,\*</sup> Fulin Lin,<sup>a,b</sup> Yan Gao,<sup>a</sup> Yao Cheng,<sup>a</sup> Ju Xu,<sup>a</sup> Yuansheng Wang<sup>a,\*</sup>

<sup>a</sup> CAS Key Laboratory of Design and Assembly of Functional Nanostructures, and Fujian Key Laboratory of Nanomaterials, Fujian Institute of Research on the Structure of Matter, Chinese Academy of Sciences, Fuzhou, Fujian, 350002 (P. R. China);

<sup>b</sup> Xiamen Institute of Rare-earth Materials, Haixi Institutes, Chinese Academy of Sciences, Xiamen, Fujian 361000 (P. R. China)

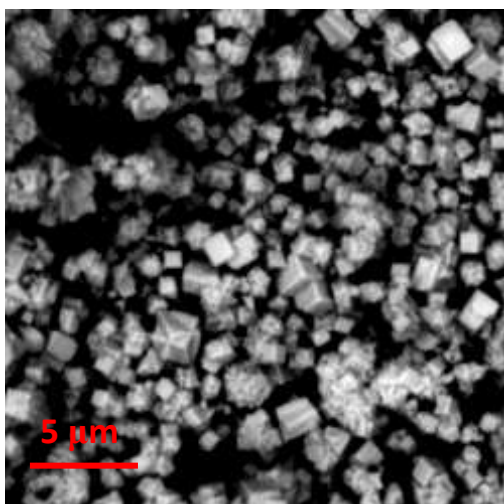

Fig. S1 SEM image of  $\text{KZnF}_3: \text{Mn}^{4+}$

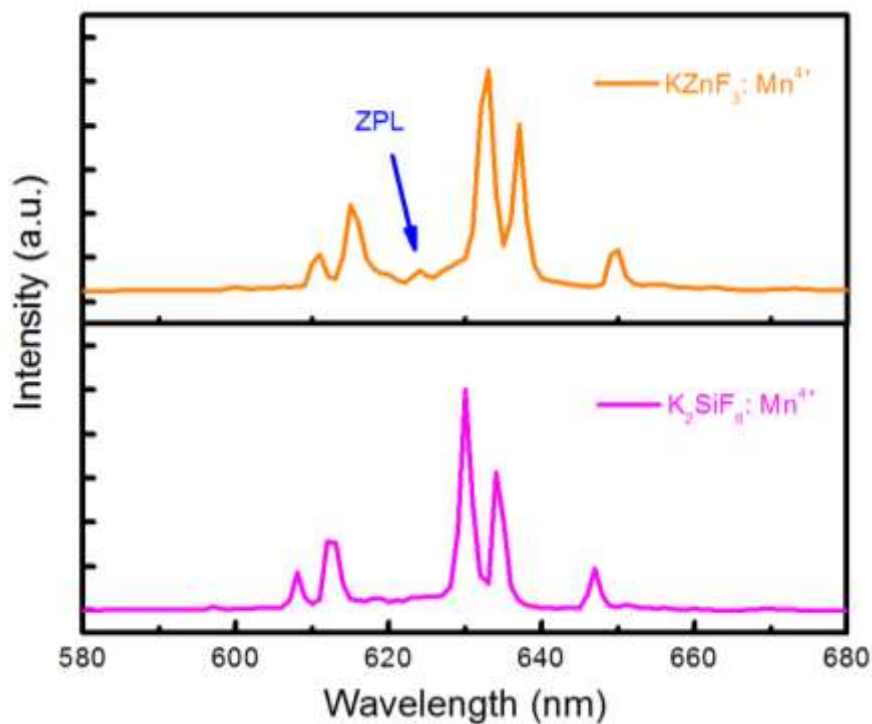

Fig. S2 PL spectra of  $\text{KZnF}_3: \text{Mn}^{4+}$  and  $\text{K}_2\text{SiF}_6: \text{Mn}^{4+}$

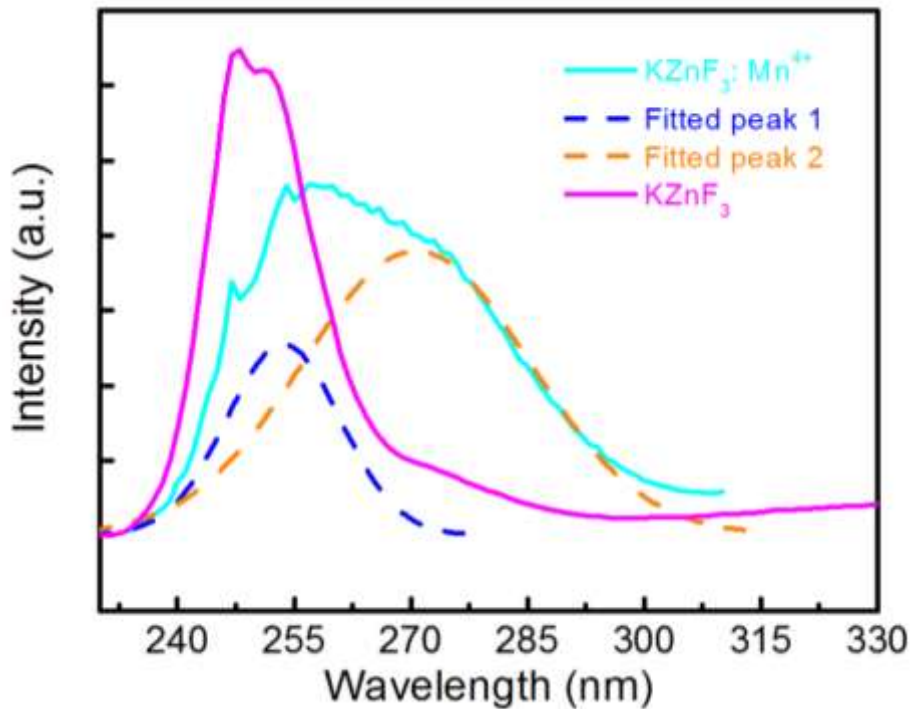

Fig. S3 PLE spectra of  $\text{KZnF}_3: \text{Mn}^{4+}$  and  $\text{KZnF}_3$  by monitoring at 633 nm and 400 nm emission, respectively. The dash peaks are the two Gaussian-fitted peaks for  $\text{KZnF}_3: \text{Mn}^{4+}$

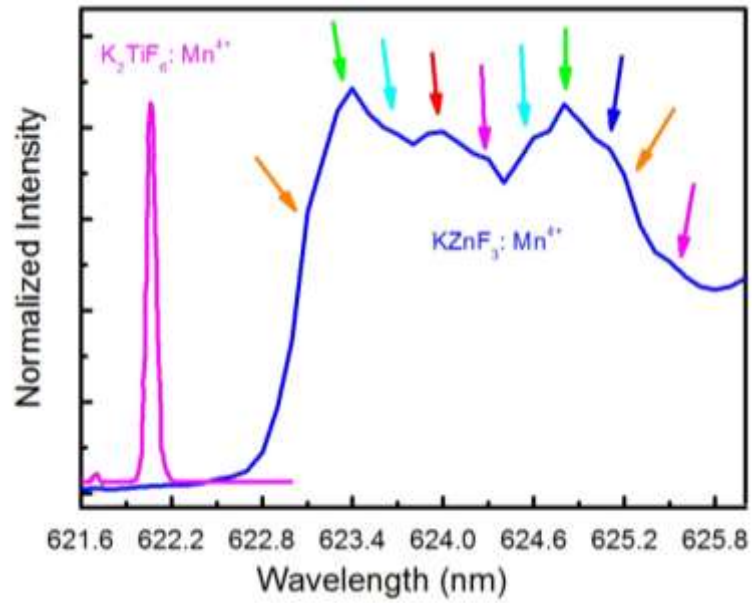

Fig. S4 The enlarged view at ZPLs of  $K_2TiF_6: Mn^{4+}$  and  $KZnF_3: Mn^{4+}$  at 10 K

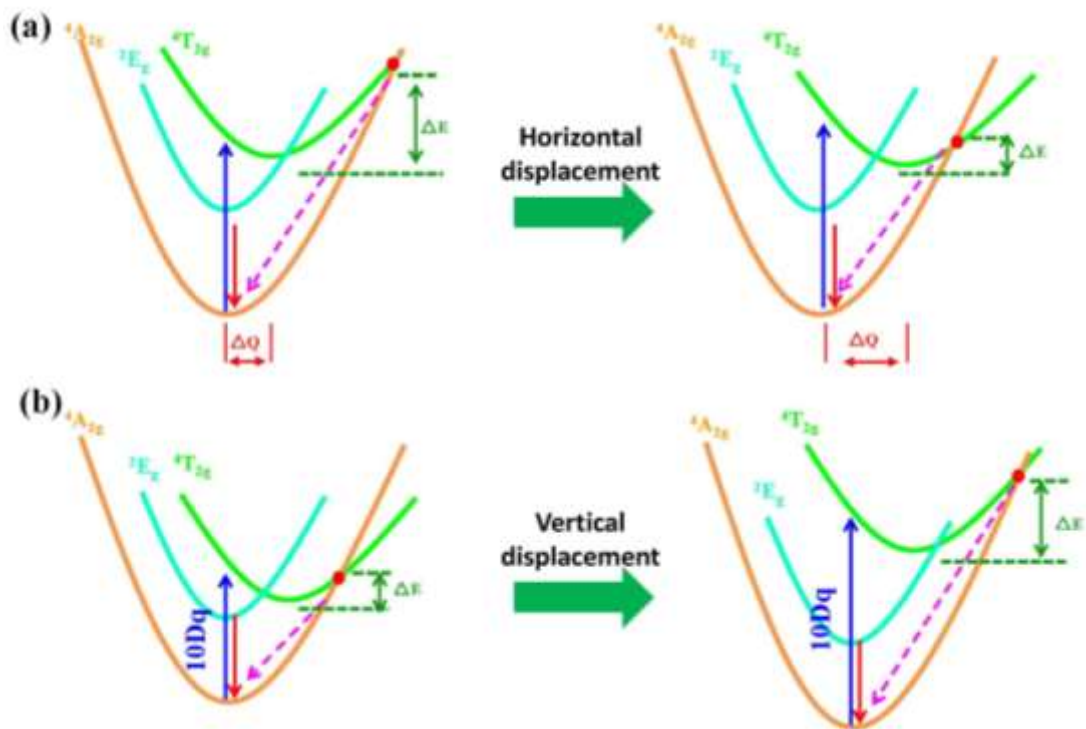

Fig. S5 Schematic illustration of the influence of  $Mn^{4+}: 4T_{2g}$  location on thermal activation energy  $\Delta E$  of  $Mn^{4+}$
